# Supplementary material for: Multitask Learning Radiomics on Longitudinal Imaging to Predict Survival Outcomes following Risk-Adaptive Chemoradiation for Non-Small Cell Lung Cancer
Source: MDPI journal article supplement (doi:10.3390/cancers14051228), 2022-02-26
Supplement: s1 [file s1]

## Supplemental Materials: Isotropic voxel-based radiomic models

Table S1: Prediction performance of overall survival for the proposed model of FLSGL combined with CWGBS using a single time point or multiple time points for each modality. Values represent c-index (95% Confidence interval) with p-values of the Friedman ANOVA test for multitask versus single task learning time points, as well as p-values of the Wilcoxon signed rank test for multitask learning of each modality relative to the benchmark model using clinical variables.

| Modality           | Single task<br>(Pre-RT) | Single task<br>(Mid-RT) | Multitask<br>(Pre-RT/Mid-RT) | Friedman<br>p-value | Wilcoxon<br>signed rank p |
|--------------------|-------------------------|-------------------------|------------------------------|---------------------|---------------------------|
| FDG-PET            | 0.64 (0.59-0.69)        | 0.59 (0.54-0.64)        | 0.69 (0.65-0.73)             | <0.01               | 0.05                      |
| CT                 | 0.56 (0.52-0.59)        | 0.66 (0.61-0.72)        | 0.66 (0.62-0.70)             | 0.01                | 0.77                      |
| SPECT*             | 0.60 (0.57 - 0.63)      | -                       | -                            | -                   | 0.20                      |
| Clinical Variables | 0.63 (0.58 - 0.70)      | 0.62 (0.56 - 0.67)      | 0.65 (0.61 - 0.71)           | 0.06                | reference                 |

\* No perfusion SPECT images acquired mid-RT

Table S2: Prediction performance of overall survival in terms of c-index for the proposed model of a single time point or multiple time points for the combination of modalities. Here, FLSGL was applied on each modality at single/multi-timepoints separately and results (each row) were ensembled using CWGBS at single/multi timepoints for different multimodality combinations. P-values of the Friedman ANOVA test are reported for each modality combination between multitask and single task learning time points.

| Modalities                                | Single task<br>(Pre-RT) | Single task<br>(Mid-RT) | Multitask<br>(Pre-RT/Mid-RT) | Friedman<br>p-value |
|-------------------------------------------|-------------------------|-------------------------|------------------------------|---------------------|
| FDG-PET + CT                              | 0.61 (0.58-0.64)        | 0.64 (0.60-0.69)        | 0.66 (0.63-0.70)             | 0.01                |
| FDG-PET + SPECT                           | 0.60 (0.56-0.64)        | 0.59 (0.54-0.64)        | 0.64 (0.60-0.68)             | 0.01                |
| FDG-PET + Clinical Variables              | 0.63 (0.58-0.68)        | 0.59 (0.54-0.64)        | 0.66 (0.62-0.70)             | 0.03                |
| FDG-PET + CT + SPECT                      | 0.57 (0.54-0.60)        | 0.64 (0.60-0.69)        | 0.64 (0.59-0.68)             | <0.01               |
| FDG-PET + CT + SPECT + Clinical Variables | 0.57 (0.53-0.62)        | 0.57 (0.52-0.63)        | 0.62 (0.57-0.67)             | 0.01                |

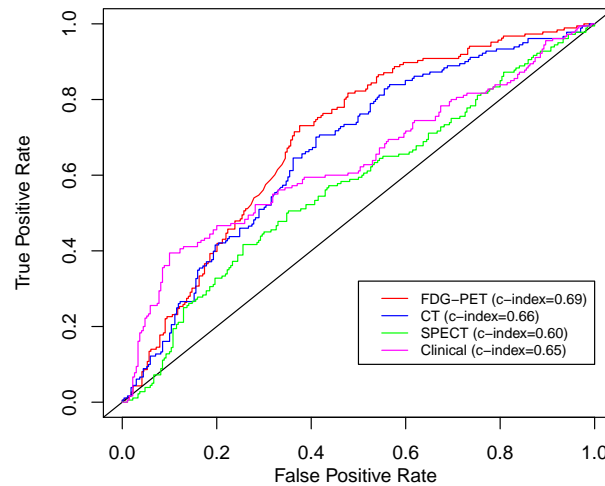

Figure S1. Receiver-operating Characteristic (ROC) curves and c-index values for different modalities.

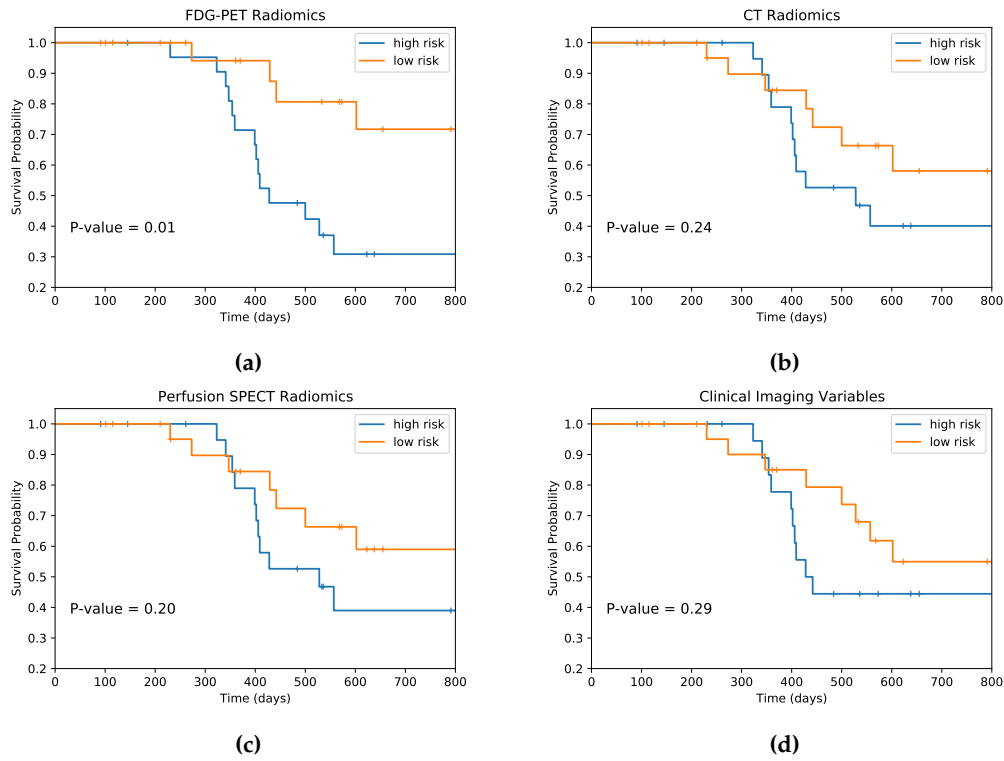

**Figure S2.** Kaplan-Meier curves of overall survival in test folds stratified by high risk (> median prediction) versus low risk (< median prediction) groups with models using the a) FDG-PET b) CT, c) SPECT radiomic features, and d) clinical-imaging variables.

**Table S3:** Comparison of FDG PET radiomics overall survival prediction models between the proposed FLSGL and CWGBS with different feature selection and survival regression models. (DR: Delta Radiomics, Coxnet: Cox Net Survival Model, RR-RFE: Ridge Regression Recursive Feature Elimination, RF: Random Forest, FLSGL: Fused Laplacian Sparse Group Lasso, RSF: Random Survival Forest, GBS: Gradient Boosting Survival, SSVM: Survival Support Vector Machine, and CWGBS: Component-Wise Gradient Boosting Survival)

| Feature Selection | Survival Analysis | Time Points       | No. of Features | C-index (95% confidence interval) | IPA (%)   |
|-------------------|-------------------|-------------------|-----------------|-----------------------------------|-----------|
| LASSO             | CWGBS             | Pre-RT            | 2-7             | 0.55 (0.51 - 0.61)                | 19        |
| LASSO+DR          | CWGBS             | Pre/Mid-RT        | 1-6             | 0.45 (0.41 - 0.58)                | -12       |
| RF+DR             | CWGBS             | Pre/Mid-RT        | 4-12            | 0.54 (0.50 - 0.59)                | 13        |
| RR-RFE            | CWGBS             | Pre-RT            | 10-15           | 0.61 (0.56 - 0.65)                | 23        |
| RF                | CWGBS             | Pre-RT            | 4-14            | 0.56 (0.51 - 0.60)                | 19        |
| FLSGL             | RSF               | Pre/Mid-RT        | 1-6             | 0.66 (0.60 - 0.71)                | 29        |
| FLSGL             | Coxnet            | Pre/Mid-RT        | 1-5             | 0.67 (0.63 - 0.72)                | 29        |
| FLSGL             | SSVM              | Pre/Mid-RT        | 1-5             | 0.62 (0.59 - 0.69)                | - *       |
| FLSGL             | GBS               | Pre/Mid-RT        | 1-5             | 0.59 (0.58 - 0.64)                | 13        |
| <b>FLSGL</b>      | <b>CWGBS</b>      | <b>Pre/Mid-RT</b> | <b>1-5</b>      | <b>0.69 (0.65 - 0.73)</b>         | <b>30</b> |

\*Brier score-derived IPA is not calculated as SSVM does not generate predicted probability

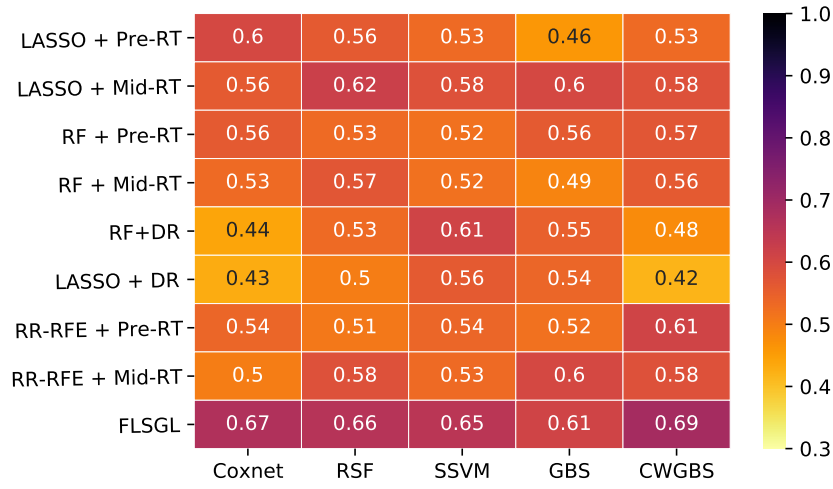

**Figure S3.** Heatmap of c-index values of overall survival prediction for different feature selection and survival analysis algorithms using FDG-PET radiomics. (DR: Delta Radiomics, Cox: Cox Net Survival Model, RR-RFE: Ridge Regression Recursive Feature Elimination, RF: Random Forest, FLSGL: Fused Laplacian Sparse Group Lasso, RSF: Random Survival Forest, GBS: Gradient Boosting Survival, SSVM: Survival Support Vector Machine, and CWGBS: Component-Wise Gradient Boosting Survival)

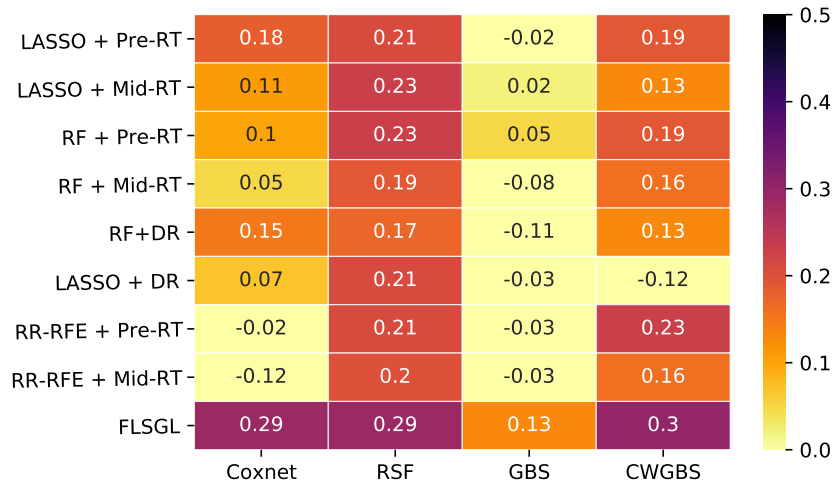

**Figure S4.** Heatmap of IPA values of overall survival prediction for different feature selection and survival analysis algorithms using FDG-PET radiomics. (DR: Delta Radiomics, Cox: Cox Net Survival Model, RR-RFE: Ridge Regression Recursive Feature Elimination, RF: Random Forest, FLSGL: Fused Laplacian Sparse Group Lasso, RSF: Random Survival Forest, GBS: Gradient Boosting Survival, and CWGBS: Component-Wise Gradient Boosting Survival)
